# Supplementary material
Source: Elsevier journal article supplement (https://www.sciencedirect.com/science/article/pii/S0213911121000510)
Supplement: mmc1 [file S0213911121000510:mmc1.doc]

**Appendix**

**1. Syntax used in the Tables**

**- Descriptive Table 1**

Descriptive are obtained by a summary estimates of each variable previously categorized 0,1 in each category according to:

tabstat edatg1 edatg2 edatg3 edatg4 edatg5 edatg6 ecivil2 naix cs1 cs2 cs3 cs4 cs5 sitlab1 sitlab sitlab3 sitlab4 sitlab5 sitlab6 salut goldberg [aw=pes_most] if sexe==1 & t==0

where edatg* stands for age-goup; naix for foreign born; cs* for occupational social class, sitlab* for each labour situation; salut stands for self-perceived health; goldberg for mental health: pes_most is the survey design weight and sexe is sex.

The expression is computed by each year t=0,1,2,3 and sex=1,2.

**- Prevalences and confidence intervals in Table 2**

Age-adjusted prevalences and confidence intervals are computed by collapsing data and using age-standardized weights according to:

collapse (mean) meanS=salut (sd) sdS=salut (count) n=salut [iw=ST_cs], by(t cs sexe)

collapse (mean) meanS=goldberg (sd) sdS=goldberg (count) n=goldberg [iw=ST_cs], by(t cs sexe)

gen meanS2=meanS*100

gen sdS2=sdS*100

generate hiS=meanS2+invttail(n-1,0.025)*(sdS2/sqrt(n))

generate lowS=meanS2-invttail(n-1,0.025)*(sdS2/sqrt(n))

sort sexe t cs

list sexe t cs meanS2 lowS hiS

**- Syntax of models in Table 3**

Relative risk is obtained by glm poisson robust regression on the categorical class variable according to:

glm salut i.edatg i.ecivil2 i.naix i.cs [iw=pes_most] if sexe==1 & t==0, family(poisson) link(log) vce(robust) eform

The expression is run for each year t=0, 1, 2, 3 and sex= 1,2

Previous to obtaining the RII and the SII, it is needed to compute the midpoints of the cumulative frequency distribution of the occupational class for men and women, which in the expression below corresponds to the IcsH, IcsD. For instance, the values of the IcsH for the first year and men are for CSI=0.08679 … CSV=0.9718, so that the continuous variable ranges in the interval 0-1.

The following expression computes the base and adjusted RII (the coefficient of the IcsH):

glm salut i.edatg i.ecivil2 i.naix IcsH [iw=pes_most] if t==0, family(poisson) link(log) vce(robust) eform

glm salut i.edatg i.ecivil2 i.naix i.sitlab0 IcsH [iw=pes_most] if t==0, family(poisson) link(log) vce(robust) eform

Changing the year t=0,1,2,3, and the sexe=1,2 the other RII can be obtained.

The SII as a percentage is computed running the following expression to each of the above regressions (changing IcsH for IcsD when women):

nlcom (exp(_b[IcsH]+_b[_cons]) - exp(_b[_cons]))*100

**2. Detailed results of Table 3**

**Below there are the detailed regression for the relative risk and the base and adjusted index of inequality (RII) aplying the expressions of the syntax above. The SII are obtained simply applying the expression above once the RII are obtained.**

**- Relative risk for men year 2001**

Generalized linear models No. of obs = 3,288

Optimization : ML Residual df = 3,275

Scale parameter = 1

Deviance = 1686.772886 (1/df) Deviance = .5150452

Pearson = 2434.070263 (1/df) Pearson = .7432276

Variance function: V(u) = u [Poisson]

Link function : g(u) = ln(u) [Log]

AIC = .9192424

Log pseudolikelihood = -1498.23444 BIC = -24834.29

------------------------------------------------------------------------------

| Robust

salut | IRR Std. Err. z P>|z| [95% Conf. Interval]

-------------+----------------------------------------------------------------

edatg |

1 | 2.240734 .452669 3.99 0.000 1.508107 3.329266

2 | 3.575634 .6933282 6.57 0.000 2.445131 5.228825

3 | 5.959776 1.078898 9.86 0.000 4.179621 8.498122

4 | 7.42218 1.361633 10.93 0.000 5.180535 10.6338

5 | 10.134 1.904131 12.33 0.000 7.012036 14.64595

|

ecivil2 |

1 | 1.251697 .1453691 1.93 0.053 .9968798 1.57165

2 | 1.083393 .1184756 0.73 0.464 .8743833 1.342363

|

1.naix | 1.29566 .2584653 1.30 0.194 .8763725 1.91555

|

cs |

CS II | .9691541 .2505125 -0.12 0.904 .5839416 1.608482

CS III | 2.051174 .3203346 4.60 0.000 1.510321 2.785709

CS IV | 2.778285 .4177139 6.80 0.000 2.069184 3.730393

CS V | 2.782726 .5142232 5.54 0.000 1.937207 3.997284

|

_cons | .0224681 .0047509 -17.95 0.000 .014845 .0340058

------------------------------------------------------------------------------

**- Relative risk for men year 2006**

Generalized linear models No. of obs = 1,073

Optimization : ML Residual df = 1,060

Scale parameter = 1

Deviance = 531.6166998 (1/df) Deviance = .5015252

Pearson = 865.8803846 (1/df) Pearson = .8168683

Variance function: V(u) = u [Poisson]

Link function : g(u) = ln(u) [Log]

AIC = .8744244

Log pseudolikelihood = -456.1286985 BIC = -6865.29

------------------------------------------------------------------------------

| Robust

salut | IRR Std. Err. z P>|z| [95% Conf. Interval]

-------------+----------------------------------------------------------------

edatg |

1 | 2.887214 1.027545 2.98 0.003 1.437278 5.799857

2 | 3.981316 1.38243 3.98 0.000 2.015878 7.863012

3 | 3.848836 1.360339 3.81 0.000 1.925216 7.694482

4 | 7.847307 2.609954 6.19 0.000 4.089005 15.05996

5 | 9.67845 3.279126 6.70 0.000 4.982105 18.80177

|

ecivil2 |

1 | .9202748 .1914836 -0.40 0.690 .6120772 1.383658

2 | .8417369 .1873935 -0.77 0.439 .5440963 1.302198

|

1.naix | .9533153 .2427348 -0.19 0.851 .5787649 1.570258

|

cs |

CS II | 1.371903 .4473672 0.97 0.332 .7240238 2.599524

CS III | 1.816822 .4550225 2.38 0.017 1.112063 2.968216

CS IV | 2.291228 .5116687 3.71 0.000 1.479044 3.549405

CS V | 3.125464 .8621625 4.13 0.000 1.82016 5.366849

|

_cons | .0271732 .010909 -8.98 0.000 .0123713 .059685

------------------------------------------------------------------------------

**- Relative risk for men year 2011**

Generalized linear models No. of obs = 1,409

Optimization : ML Residual df = 1,396

Scale parameter = 1

Deviance = 725.8846228 (1/df) Deviance = .5199747

Pearson = 1101.85918 (1/df) Pearson = .7892974

Variance function: V(u) = u [Poisson]

Link function : g(u) = ln(u) [Log]

AIC = .8813486

Log pseudolikelihood = -607.910099 BIC = -9396.003

------------------------------------------------------------------------------

| Robust

salut | IRR Std. Err. z P>|z| [95% Conf. Interval]

-------------+----------------------------------------------------------------

edatg |

1 | 2.734681 .9122041 3.02 0.003 1.422238 5.258246

2 | 5.105015 1.664439 5.00 0.000 2.694457 9.672143

3 | 7.95389 2.535119 6.51 0.000 4.258716 14.85527

4 | 6.484189 2.194897 5.52 0.000 3.339828 12.58889

5 | 9.947617 3.207702 7.12 0.000 5.287387 18.71531

|

ecivil2 |

1 | 1.106382 .1953507 0.57 0.567 .7827278 1.563865

2 | 1.1375 .1971514 0.74 0.457 .8098805 1.597649

|

1.naix | 1.054515 .2118313 0.26 0.792 .7113169 1.5633

|

cs |

CS II | 1.412258 .3181836 1.53 0.125 .9081075 2.196296

CS III | 1.465472 .2732043 2.05 0.040 1.016928 2.111859

CS IV | 1.394302 .2458157 1.89 0.059 .9869377 1.969807

CS V | 1.544376 .3287172 2.04 0.041 1.017598 2.343848

|

_cons | .0284826 .009267 -10.94 0.000 .0150534 .053892

------------------------------------------------------------------------------

**- Relative risk for men year 2016**

Generalized linear models No. of obs = 1,413

Optimization : ML Residual df = 1,400

Scale parameter = 1

Deviance = 732.0661227 (1/df) Deviance = .5229044

Pearson = 1111.317778 (1/df) Pearson = .7937984

Variance function: V(u) = u [Poisson]

Link function : g(u) = ln(u) [Log]

AIC = .8799087

Log pseudolikelihood = -608.655466 BIC = -9422.792

------------------------------------------------------------------------------

| Robust

salut | IRR Std. Err. z P>|z| [95% Conf. Interval]

-------------+----------------------------------------------------------------

edatg |

1 | 2.367452 .7227099 2.82 0.005 1.301474 4.306522

2 | 4.057197 1.185388 4.79 0.000 2.288396 7.193182

3 | 4.185563 1.306258 4.59 0.000 2.270416 7.716181

4 | 6.670327 2.121791 5.97 0.000 3.575897 12.44254

5 | 10.2721 3.105688 7.70 0.000 5.679434 18.57861

|

ecivil2 |

1 | 1.201723 .1860641 1.19 0.235 .8871802 1.627784

2 | .723047 .1419034 -1.65 0.098 .4921663 1.062236

|

1.naix | .9708713 .1778842 -0.16 0.872 .6779591 1.390336

|

cs |

CS II | 1.377437 .4245924 1.04 0.299 .7528192 2.520305

CS III | 1.54535 .3217466 2.09 0.037 1.027553 2.324072

CS IV | 1.83573 .3408706 3.27 0.001 1.27571 2.641591

CS V | 2.78987 .6120715 4.68 0.000 1.814839 4.288739

|

_cons | .0278216 .0087614 -11.37 0.000 .0150082 .0515748

------------------------------------------------------------------------------

**- Relative risk for women year 2001**

Generalized linear models No. of obs = 3,595

Optimization : ML Residual df = 3,582

Scale parameter = 1

Deviance = 2012.455867 (1/df) Deviance = .5618246

Pearson = 2536.831928 (1/df) Pearson = .7082166

Variance function: V(u) = u [Poisson]

Link function : g(u) = ln(u) [Log]

AIC = 1.123585

Log pseudolikelihood = -2006.643933 BIC = -27314.45

------------------------------------------------------------------------------

| Robust

salut | IRR Std. Err. z P>|z| [95% Conf. Interval]

-------------+----------------------------------------------------------------

edatg |

1 | 1.655839 .277146 3.01 0.003 1.192746 2.298729

2 | 2.902904 .4476302 6.91 0.000 2.145738 3.927251

3 | 4.00639 .5865876 9.48 0.000 3.006951 5.33802

4 | 5.219646 .7531887 11.45 0.000 3.933813 6.925776

5 | 6.266427 .9254841 12.43 0.000 4.691445 8.370152

|

ecivil2 |

1 | .8048597 .0808861 -2.16 0.031 .6609625 .9800845

2 | .9901211 .0599523 -0.16 0.870 .8793214 1.114882

|

1.naix | 1.011326 .150596 0.08 0.940 .7553343 1.354076

|

cs |

CS II | 1.356428 .2906989 1.42 0.155 .8911978 2.064522

CS III | 1.624186 .2889043 2.73 0.006 1.146112 2.301677

CS IV | 2.52508 .4345237 5.38 0.000 1.802178 3.537957

CS V | 3.038115 .5297407 6.37 0.000 2.158661 4.275864

|

_cons | .0440828 .009622 -14.30 0.000 .0287393 .0676181

------------------------------------------------------------------------------

**- Relative risk for women year 2006**

Generalized linear models No. of obs = 1,164

Optimization : ML Residual df = 1,151

Scale parameter = 1

Deviance = 683.3039173 (1/df) Deviance = .5936611

Pearson = 786.6948735 (1/df) Pearson = .6834882

Variance function: V(u) = u [Poisson]

Link function : g(u) = ln(u) [Log]

AIC = 1.175927

Log pseudolikelihood = -671.3897639 BIC = -7442.316

------------------------------------------------------------------------------

| Robust

salut | IRR Std. Err. z P>|z| [95% Conf. Interval]

-------------+----------------------------------------------------------------

edatg |

1 | 2.101517 .5203233 3.00 0.003 1.293542 3.414173

2 | 2.687713 .6336063 4.19 0.000 1.693242 4.266254

3 | 3.981909 .9148556 6.01 0.000 2.538196 6.246797

4 | 5.03255 1.134894 7.17 0.000 3.234693 7.829665

5 | 4.742219 1.123076 6.57 0.000 2.981232 7.543405

|

ecivil2 |

1 | .862938 .1291948 -0.98 0.325 .6434902 1.157223

2 | .8721536 .1023257 -1.17 0.244 .6929876 1.097641

|

1.naix | 1.318485 .2320598 1.57 0.116 .9338119 1.861619

|

cs |

CS II | 1.2232 .4014385 0.61 0.539 .6429013 2.327292

CS III | 1.762519 .4780746 2.09 0.037 1.035737 2.999287

CS IV | 2.317672 .6157093 3.16 0.002 1.376966 3.901045

CS V | 2.827754 .7693265 3.82 0.000 1.659057 4.81972

|

_cons | .0517936 .0152933 -10.03 0.000 .0290361 .0923877

------------------------------------------------------------------------------

**- Relative risk for women year 2011**

Generalized linear models No. of obs = 1,436

Optimization : ML Residual df = 1,423

Scale parameter = 1

Deviance = 850.5412847 (1/df) Deviance = .59771

Pearson = 1109.837942 (1/df) Pearson = .7799283

Variance function: V(u) = u [Poisson]

Link function : g(u) = ln(u) [Log]

AIC = 1.077158

Log pseudolikelihood = -760.3993887 BIC = -9494.123

------------------------------------------------------------------------------

| Robust

salut | IRR Std. Err. z P>|z| [95% Conf. Interval]

-------------+----------------------------------------------------------------

edatg |

1 | 2.196665 .5229488 3.31 0.001 1.377598 3.502717

2 | 2.636742 .6393801 4.00 0.000 1.639309 4.24106

3 | 2.809041 .6789544 4.27 0.000 1.749121 4.511243

4 | 5.397318 1.25098 7.27 0.000 3.426795 8.500958

5 | 5.999638 1.406176 7.64 0.000 3.789859 9.497887

|

ecivil2 |

1 | .8154138 .1223481 -1.36 0.174 .6076594 1.094198

2 | .8251998 .1016819 -1.56 0.119 .6481467 1.050618

|

1.naix | 1.049798 .1734311 0.29 0.769 .7594228 1.451202

|

cs |

CS II | .8493526 .2001759 -0.69 0.488 .535151 1.34803

CS III | 1.25761 .2219639 1.30 0.194 .8898397 1.77738

CS IV | 1.270036 .2257623 1.34 0.179 .8964081 1.799393

CS V | 1.481415 .279217 2.09 0.037 1.023864 2.143439

|

_cons | .0731525 .0177591 -10.77 0.000 .0454553 .1177264

------------------------------------------------------------------------------

**- Relative risk for women year 2016**

Generalized linear models No. of obs = 1,569

Optimization : ML Residual df = 1,556

Scale parameter = 1

Deviance = 876.6658847 (1/df) Deviance = .56341

Pearson = 1171.694555 (1/df) Pearson = .7530171

Variance function: V(u) = u [Poisson]

Link function : g(u) = ln(u) [Log]

AIC = 1.040226

Log pseudolikelihood = -803.0574775 BIC = -10572.68

------------------------------------------------------------------------------

| Robust

salut | IRR Std. Err. z P>|z| [95% Conf. Interval]

-------------+----------------------------------------------------------------

edatg |

1 | 1.544818 .4028188 1.67 0.095 .926664 2.575326

2 | 3.19825 .7631995 4.87 0.000 2.003503 5.105461

3 | 3.989896 .9530255 5.79 0.000 2.498296 6.372053

4 | 4.330879 1.01823 6.23 0.000 2.731811 6.865964

5 | 6.056599 1.410786 7.73 0.000 3.836678 9.560978

|

ecivil2 |

1 | 1.173571 .1586596 1.18 0.236 .9003928 1.529631

2 | 1.134054 .116684 1.22 0.221 .9269428 1.387442

|

1.naix | 1.071476 .1380007 0.54 0.592 .8324384 1.379154

|

cs |

CS II | 1.501127 .3830179 1.59 0.111 .9103962 2.475168

CS III | 1.79589 .3666805 2.87 0.004 1.203603 2.679637

CS IV | 2.375523 .4771157 4.31 0.000 1.602501 3.521439

CS V | 3.354099 .682988 5.94 0.000 2.250337 4.999243

|

_cons | .0350919 .010722 -10.96 0.000 .019281 .0638681

------------------------------------------------------------------------------

**- Base model, index of relative inequality for men 2001**

Generalized linear models No. of obs = 3,288

Optimization : ML Residual df = 3,278

Scale parameter = 1

Deviance = 1697.655386 (1/df) Deviance = .5178937

Pearson = 2463.762645 (1/df) Pearson = .7516054

Variance function: V(u) = u [Poisson]

Link function : g(u) = ln(u) [Log]

AIC = .9207273

Log pseudolikelihood = -1503.67569 BIC = -24847.7

------------------------------------------------------------------------------

| Robust

salut | IRR Std. Err. z P>|z| [95% Conf. Interval]

-------------+----------------------------------------------------------------

edatg |

1 | 2.288746 .4622238 4.10 0.000 1.540611 3.400181

2 | 3.661811 .7085033 6.71 0.000 2.506119 5.350448

3 | 6.059628 1.098015 9.94 0.000 4.248218 8.643409

4 | 7.729776 1.413125 11.19 0.000 5.40199 11.06063

5 | 10.45373 1.959424 12.52 0.000 7.239758 15.0945

|

ecivil2 |

1 | 1.234193 .14449 1.80 0.072 .9811392 1.552513

2 | 1.052055 .1154467 0.46 0.644 .8484622 1.304502

|

1.naix | 1.295131 .254014 1.32 0.187 .8817952 1.902217

IcsH | 3.415607 .4691027 8.94 0.000 2.609535 4.470672

_cons | .0233884 .0043028 -20.41 0.000 .0163082 .0335426

------------------------------------------------------------------------------

**- Adjusted model, index of relative inequality for men 2001**

Generalized linear models No. of obs = 3,288

Optimization : ML Residual df = 3,273

Scale parameter = 1

Deviance = 1605.77481 (1/df) Deviance = .4906125

Pearson = 2417.017301 (1/df) Pearson = .7384715

Variance function: V(u) = u [Poisson]

Link function : g(u) = ln(u) [Log]

AIC = .8958245

Log pseudolikelihood = -1457.735402 BIC = -24899.09

------------------------------------------------------------------------------

| Robust

salut | IRR Std. Err. z P>|z| [95% Conf. Interval]

-------------+----------------------------------------------------------------

edatg |

1 | 2.056323 .4145053 3.58 0.000 1.385191 3.052622

2 | 2.917606 .56072 5.57 0.000 2.001882 4.25221

3 | 3.759867 .7564717 6.58 0.000 2.534626 5.577392

4 | 4.378734 .9677998 6.68 0.000 2.839315 6.752793

5 | 6.03881 1.37027 7.92 0.000 3.870836 9.421021

|

ecivil2 |

1 | 1.039302 .1128171 0.36 0.722 .8401235 1.285702

2 | 1.054638 .1166854 0.48 0.631 .8490367 1.310028

|

1.naix | 1.35982 .2760192 1.51 0.130 .9134878 2.024231

|

sitlab0 |

1 | 7.83e-06 6.34e-06 -14.54 0.000 1.61e-06 .0000382

2 | 2.222138 .3482221 5.10 0.000 1.634492 3.02106

3 | 1.750859 .2386709 4.11 0.000 1.340351 2.287094

4 | 1.112511 .5815941 0.20 0.838 .3993161 3.099503

5 | 4.24492 .482705 12.71 0.000 3.396849 5.304722

|

IcsH | 2.747539 .3742374 7.42 0.000 2.103794 3.588265

_cons | .0264263 .0048199 -19.92 0.000 .0184835 .0377822

------------------------------------------------------------------------------

**- Base model, index of relative inequality for men 2006**

Generalized linear models No. of obs = 1,073

Optimization : ML Residual df = 1,063

Scale parameter = 1

Deviance = 532.2002559 (1/df) Deviance = .5006588

Pearson = 854.6238006 (1/df) Pearson = .8039735

Variance function: V(u) = u [Poisson]

Link function : g(u) = ln(u) [Log]

AIC = .8693765

Log pseudolikelihood = -456.4204766 BIC = -6885.641

------------------------------------------------------------------------------

| Robust

salut | IRR Std. Err. z P>|z| [95% Conf. Interval]

-------------+----------------------------------------------------------------

edatg |

1 | 2.861424 1.010447 2.98 0.003 1.432186 5.716956

2 | 3.965864 1.362728 4.01 0.000 2.022334 7.777192

3 | 3.808641 1.330549 3.83 0.000 1.920448 7.553311

4 | 7.745547 2.555797 6.20 0.000 4.056778 14.78846

5 | 9.585674 3.223946 6.72 0.000 4.958363 18.53135

|

ecivil2 |

1 | .9127951 .1898998 -0.44 0.661 .6071382 1.372331

2 | .8444703 .1889584 -0.76 0.450 .5446529 1.30933

|

1.naix | .9461992 .2393416 -0.22 0.827 .5763294 1.55344

IcsH | 3.34409 .8459197 4.77 0.000 2.036846 5.490319

_cons | .0264617 .0094124 -10.21 0.000 .0131779 .0531359

------------------------------------------------------------------------------

**- Adjusted model, index of relative inequality for men 2006**

Generalized linear models No. of obs = 1,073

Optimization : ML Residual df = 1,058

Scale parameter = 1

Deviance = 518.3196079 (1/df) Deviance = .4899051

Pearson = 855.2560234 (1/df) Pearson = .8083705

Variance function: V(u) = u [Poisson]

Link function : g(u) = ln(u) [Log]

AIC = .8657598

Log pseudolikelihood = -449.4801526 BIC = -6864.631

------------------------------------------------------------------------------

| Robust

salut | IRR Std. Err. z P>|z| [95% Conf. Interval]

-------------+----------------------------------------------------------------

edatg |

1 | 3.069779 1.113728 3.09 0.002 1.507606 6.250666

2 | 4.214673 1.496921 4.05 0.000 2.101085 8.454427

3 | 3.041847 1.203135 2.81 0.005 1.401082 6.604065

4 | 4.143355 1.859647 3.17 0.002 1.719136 9.986054

5 | 4.969679 2.257805 3.53 0.000 2.039923 12.10718

|

ecivil2 |

1 | .8646423 .18398 -0.68 0.494 .5697921 1.312069

2 | .806658 .1813407 -0.96 0.339 .5192006 1.253267

|

1.naix | 1.025723 .2611795 0.10 0.921 .6227146 1.689551

|

sitlab0 |

1 | 6.174115 2.633945 4.27 0.000 2.675734 14.24645

2 | 2.164904 .6575134 2.54 0.011 1.193758 3.926098

3 | 2.260882 .6737882 2.74 0.006 1.260674 4.054647

4 | 2.864422 2.877815 1.05 0.295 .3998117 20.52194

5 | 3.09386 1.155059 3.03 0.002 1.48838 6.431133

|

IcsH | 3.389045 .8750439 4.73 0.000 2.043144 5.621545

_cons | .0223919 .0082704 -10.29 0.000 .0108568 .0461829

------------------------------------------------------------------------------

**- Base model, index of relative inequality for men 2011**

Generalized linear models No. of obs = 1,409

Optimization : ML Residual df = 1,399

Scale parameter = 1

Deviance = 728.16599 (1/df) Deviance = .5204903

Pearson = 1106.467971 (1/df) Pearson = .7908992

Variance function: V(u) = u [Poisson]

Link function : g(u) = ln(u) [Log]

AIC = .8787094

Log pseudolikelihood = -609.0507826 BIC = -9415.473

------------------------------------------------------------------------------

| Robust

salut | IRR Std. Err. z P>|z| [95% Conf. Interval]

-------------+----------------------------------------------------------------

edatg |

1 | 2.756073 .9185104 3.04 0.002 1.43421 5.296254

2 | 5.110031 1.659919 5.02 0.000 2.70348 9.658817

3 | 7.928112 2.534302 6.48 0.000 4.237157 14.83423

4 | 6.532228 2.221024 5.52 0.000 3.354627 12.71975

5 | 9.936314 3.213307 7.10 0.000 5.271752 18.72818

|

ecivil2 |

1 | 1.121812 .1990156 0.65 0.517 .7923412 1.588283

2 | 1.149073 .1971473 0.81 0.418 .8209305 1.608381

|

1.naix | 1.037627 .2073094 0.18 0.853 .70142 1.534986

IcsH | 1.447709 .2886764 1.86 0.064 .9793769 2.139995

_cons | .0316484 .0102961 -10.61 0.000 .0167276 .0598785

------------------------------------------------------------------------------

**- Adjusted model, index of relative inequality for men 2011**

Generalized linear models No. of obs = 1,409

Optimization : ML Residual df = 1,395

Scale parameter = 1

Deviance = 694.1800028 (1/df) Deviance = .4976201

Pearson = 1057.152581 (1/df) Pearson = .7578155

Variance function: V(u) = u [Poisson]

Link function : g(u) = ln(u) [Log]

AIC = .8602666

Log pseudolikelihood = -592.057789 BIC = -9420.457

------------------------------------------------------------------------------

| Robust

salut | IRR Std. Err. z P>|z| [95% Conf. Interval]

-------------+----------------------------------------------------------------

edatg |

1 | 2.437847 .7775378 2.79 0.005 1.30473 4.555043

2 | 4.10437 1.307925 4.43 0.000 2.197846 7.664711

3 | 4.414501 1.53336 4.27 0.000 2.234705 8.720537

4 | 2.990164 1.201267 2.73 0.006 1.36061 6.571375

5 | 4.58849 1.756054 3.98 0.000 2.167244 9.714754

|

ecivil2 |

1 | .9802302 .1700182 -0.12 0.908 .6977335 1.377104

2 | 1.009652 .1701918 0.06 0.955 .7255862 1.404929

|

1.naix | 1.105471 .2250578 0.49 0.622 .7417456 1.647554

|

sitlab0 |

2 | 1.531579 .3517866 1.86 0.063 .9764006 2.402431

3 | 2.200201 .5078573 3.42 0.001 1.39954 3.458911

4 | 2.00e-06 6.86e-07 -38.23 0.000 1.02e-06 3.92e-06

5 | 4.49333 .9272399 7.28 0.000 2.998576 6.733201

|

IcsH | 1.215665 .2445564 0.97 0.332 .819553 1.803229

_cons | .0357305 .0112583 -10.57 0.000 .0192679 .0662588

------------------------------------------------------------------------------

**- Base model, index of relative inequality for men 2016**

Generalized linear models No. of obs = 1,413

Optimization : ML Residual df = 1,403

Scale parameter = 1

Deviance = 733.4573511 (1/df) Deviance = .5227779

Pearson = 1117.283509 (1/df) Pearson = .7963532

Variance function: V(u) = u [Poisson]

Link function : g(u) = ln(u) [Log]

AIC = .876647

Log pseudolikelihood = -609.3510802 BIC = -9443.162

------------------------------------------------------------------------------

| Robust

salut | IRR Std. Err. z P>|z| [95% Conf. Interval]

-------------+----------------------------------------------------------------

edatg |

1 | 2.347057 .7164606 2.79 0.005 1.290288 4.26934

2 | 4.073481 1.19412 4.79 0.000 2.293192 7.235875

3 | 4.166313 1.304559 4.56 0.000 2.255397 7.696278

4 | 6.508079 2.072655 5.88 0.000 3.486319 12.14894

5 | 10.05527 3.045099 7.62 0.000 5.554166 18.20406

|

ecivil2 |

1 | 1.206058 .1869968 1.21 0.227 .8900028 1.634351

2 | .7369591 .143 -1.57 0.116 .5038203 1.077981

|

1.naix | .9683953 .1777102 -0.18 0.861 .6758475 1.387575

IcsH | 2.82778 .6458679 4.55 0.000 1.8073 4.424467

_cons | .0260178 .0078482 -12.10 0.000 .0144048 .046993

------------------------------------------------------------------------------

**- Adjusted model, index of relative inequality for men 2016**

Generalized linear models No. of obs = 1,413

Optimization : ML Residual df = 1,398

Scale parameter = 1

Deviance = 649.2683295 (1/df) Deviance = .4644266

Pearson = 1058.819738 (1/df) Pearson = .7573818

Variance function: V(u) = u [Poisson]

Link function : g(u) = ln(u) [Log]

AIC = .8241423

Log pseudolikelihood = -567.2565694 BIC = -9491.083

------------------------------------------------------------------------------

| Robust

salut | IRR Std. Err. z P>|z| [95% Conf. Interval]

-------------+----------------------------------------------------------------

edatg |

1 | 2.15604 .6309083 2.63 0.009 1.214997 3.825943

2 | 3.02896 .851996 3.94 0.000 1.745279 5.256811

3 | 2.352027 .7705955 2.61 0.009 1.23755 4.470147

4 | 2.699594 .9738364 2.75 0.006 1.331192 5.474647

5 | 4.353343 1.586335 4.04 0.000 2.131325 8.891932

|

ecivil2 |

1 | .8579282 .1411415 -0.93 0.352 .6214641 1.184366

2 | .6049632 .1115902 -2.72 0.006 .421423 .8684399

|

1.naix | 1.075464 .20028 0.39 0.696 .7465854 1.549217

|

sitlab0 |

1 | .0000289 .0000299 -10.11 0.000 3.81e-06 .0002193

2 | 2.179195 .4967927 3.42 0.001 1.393949 3.406788

3 | 2.78436 .6723655 4.24 0.000 1.734514 4.469645

4 | 2.274741 1.637012 1.14 0.253 .5550943 9.321741

5 | 8.660571 1.557372 12.01 0.000 6.088085 12.32005

|

IcsH | 2.082576 .4686155 3.26 0.001 1.339879 3.236949

_cons | .027066 .0077085 -12.67 0.000 .0154881 .0472988

------------------------------------------------------------------------------

**- Base model, index of relative inequality for women 2001**

Generalized linear models No. of obs = 3,595

Optimization : ML Residual df = 3,585

Scale parameter = 1

Deviance = 2015.098443 (1/df) Deviance = .5620916

Pearson = 2522.604544 (1/df) Pearson = .7036554

Variance function: V(u) = u [Poisson]

Link function : g(u) = ln(u) [Log]

AIC = 1.122651

Log pseudolikelihood = -2007.965221 BIC = -27336.37

------------------------------------------------------------------------------

| Robust

salut | IRR Std. Err. z P>|z| [95% Conf. Interval]

-------------+----------------------------------------------------------------

edatg |

1 | 1.648481 .2767069 2.98 0.003 1.186329 2.290673

2 | 2.91782 .4523915 6.91 0.000 2.1532 3.953962

3 | 4.02746 .5912465 9.49 0.000 3.02045 5.370205

4 | 5.273972 .7595201 11.55 0.000 3.976983 6.993939

5 | 6.388536 .9380867 12.63 0.000 4.79084 8.519046

|

ecivil2 |

1 | .8088143 .0816436 -2.10 0.036 .663631 .9857597

2 | .9807233 .0595487 -0.32 0.749 .8706873 1.104665

|

1.naix | .9991852 .1491872 -0.01 0.996 .7456826 1.338869

IcsD | 3.158666 .3433311 10.58 0.000 2.552597 3.908634

_cons | .0484391 .0071493 -20.51 0.000 .0362713 .0646887

------------------------------------------------------------------------------

**- Adjusted models, index of relative inequality for women 2001**

Generalized linear models No. of obs = 3,595

Optimization : ML Residual df = 3,580

Scale parameter = 1

Deviance = 1952.452345 (1/df) Deviance = .5453778

Pearson = 2485.338323 (1/df) Pearson = .6942286

Variance function: V(u) = u [Poisson]

Link function : g(u) = ln(u) [Log]

AIC = 1.108007

Log pseudolikelihood = -1976.642172 BIC = -27358.08

------------------------------------------------------------------------------

| Robust

salut | IRR Std. Err. z P>|z| [95% Conf. Interval]

-------------+----------------------------------------------------------------

edatg |

1 | 1.495764 .2425325 2.48 0.013 1.088539 2.055333

2 | 2.498003 .3741435 6.11 0.000 1.862527 3.350298

3 | 3.207075 .4737953 7.89 0.000 2.400807 4.284112

4 | 4.036553 .6167905 9.13 0.000 2.991892 5.445971

5 | 4.922666 .7811737 10.04 0.000 3.606815 6.71857

|

ecivil2 |

1 | .8201267 .0805465 -2.02 0.043 .676523 .9942128

2 | .9945659 .061689 -0.09 0.930 .8807181 1.123131

|

1.naix | 1.053605 .1569292 0.35 0.726 .7868562 1.410782

|

sitlab0 |

1 | 1.396666 .1237768 3.77 0.000 1.173968 1.661608

2 | 1.528831 .2617805 2.48 0.013 1.092972 2.138504

3 | 1.355876 .1368005 3.02 0.003 1.112599 1.652349

4 | .2426374 .2415895 -1.42 0.155 .0344693 1.707981

5 | 3.623589 .3980397 11.72 0.000 2.92171 4.494079

|

IcsD | 3.063236 .3349574 10.24 0.000 2.472314 3.795398

_cons | .0456864 .006629 -21.27 0.000 .0343778 .0607149

------------------------------------------------------------------------------

**- Base model, index of relative inequality for women 2006**

Generalized linear models No. of obs = 1,164

Optimization : ML Residual df = 1,154

Scale parameter = 1

Deviance = 684.4687706 (1/df) Deviance = .5931272

Pearson = 786.6567724 (1/df) Pearson = .6816783

Variance function: V(u) = u [Poisson]

Link function : g(u) = ln(u) [Log]

AIC = 1.171774

Log pseudolikelihood = -671.9721906 BIC = -7462.33

------------------------------------------------------------------------------

| Robust

salut | IRR Std. Err. z P>|z| [95% Conf. Interval]

-------------+----------------------------------------------------------------

edatg |

1 | 2.093607 .5207499 2.97 0.003 1.285799 3.408925

2 | 2.69696 .6356087 4.21 0.000 1.699287 4.280379

3 | 3.998084 .9165229 6.05 0.000 2.551068 6.265876

4 | 5.006913 1.127386 7.15 0.000 3.22039 7.784515

5 | 4.746473 1.127239 6.56 0.000 2.980021 7.560017

|

ecivil2 |

1 | .8621021 .1291468 -0.99 0.322 .6427541 1.156305

2 | .8730571 .1025439 -1.16 0.248 .6935308 1.099055

|

1.naix | 1.293418 .2272651 1.46 0.143 .9165904 1.825167

IcsD | 2.929737 .5545199 5.68 0.000 2.021711 4.24559

_cons | .0568073 .012398 -13.14 0.000 .0370368 .0871316

------------------------------------------------------------------------------

**- Adjusted model, index of relative inequality for women 2006**

Generalized linear models No. of obs = 1,164

Optimization : ML Residual df = 1,149

Scale parameter = 1

Deviance = 659.1009363 (1/df) Deviance = .5736301

Pearson = 778.6798876 (1/df) Pearson = .6777023

Variance function: V(u) = u [Poisson]

Link function : g(u) = ln(u) [Log]

AIC = 1.158571

Log pseudolikelihood = -659.2882734 BIC = -7452.4

------------------------------------------------------------------------------

| Robust

salut | IRR Std. Err. z P>|z| [95% Conf. Interval]

-------------+----------------------------------------------------------------

edatg |

1 | 2.052408 .5056591 2.92 0.004 1.266339 3.326421

2 | 2.563175 .5856042 4.12 0.000 1.637969 4.010983

3 | 3.48708 .8247391 5.28 0.000 2.193522 5.543474

4 | 4.058386 1.026613 5.54 0.000 2.47191 6.663066

5 | 3.906501 1.032128 5.16 0.000 2.327522 6.55665

|

ecivil2 |

1 | .8693343 .1280775 -0.95 0.342 .6512995 1.16036

2 | .8732982 .1003305 -1.18 0.238 .6972213 1.093842

|

1.naix | 1.297325 .2336888 1.45 0.148 .9114249 1.846617

|

sitlab0 |

1 | 1.52894 .2385779 2.72 0.007 1.126076 2.075932

2 | 1.802582 .4080188 2.60 0.009 1.156708 2.809096

3 | 1.300717 .2384868 1.43 0.152 .9080603 1.863163

4 | 1.547003 1.106459 0.61 0.542 .3807922 6.284837

5 | 3.518197 .5008172 8.84 0.000 2.661651 4.650387

|

IcsD | 2.664712 .5098477 5.12 0.000 1.831417 3.877157

_cons | .0518579 .0113354 -13.54 0.000 .0337873 .0795932

------------------------------------------------------------------------------

**- Base model, index of relative inequality for women 2011**

Generalized linear models No. of obs = 1,436

Optimization : ML Residual df = 1,426

Scale parameter = 1

Deviance = 852.6406384 (1/df) Deviance = .5979247

Pearson = 1107.252807 (1/df) Pearson = .7764746

Variance function: V(u) = u [Poisson]

Link function : g(u) = ln(u) [Log]

AIC = 1.074442

Log pseudolikelihood = -761.4490655 BIC = -9513.833

------------------------------------------------------------------------------

| Robust

salut | IRR Std. Err. z P>|z| [95% Conf. Interval]

-------------+----------------------------------------------------------------

edatg |

1 | 2.206771 .5230594 3.34 0.001 1.386761 3.511665

2 | 2.661295 .6400376 4.07 0.000 1.66104 4.263887

3 | 2.848262 .6859765 4.35 0.000 1.776545 4.566502

4 | 5.34735 1.240332 7.23 0.000 3.393909 8.425139

5 | 5.919785 1.396797 7.54 0.000 3.727877 9.400486

|

ecivil2 |

1 | .8168701 .1217788 -1.36 0.175 .6098965 1.094082

2 | .8288582 .102232 -1.52 0.128 .6508673 1.055524

|

1.naix | 1.039853 .1728761 0.24 0.814 .7506881 1.440405

IcsD | 1.656961 .3141271 2.66 0.008 1.142724 2.40261

_cons | .0672221 .0151819 -11.95 0.000 .0431789 .1046534

------------------------------------------------------------------------------

**- Adjusted model, index of relative inequality for women 2011**

Generalized linear models No. of obs = 1,436

Optimization : ML Residual df = 1,421

Scale parameter = 1

Deviance = 788.0075481 (1/df) Deviance = .5545444

Pearson = 1117.441057 (1/df) Pearson = .7863765

Variance function: V(u) = u [Poisson]

Link function : g(u) = ln(u) [Log]

AIC = 1.036396

Log pseudolikelihood = -729.1325204 BIC = -9542.118

------------------------------------------------------------------------------

| Robust

salut | IRR Std. Err. z P>|z| [95% Conf. Interval]

-------------+----------------------------------------------------------------

edatg |

1 | 2.035643 .4832495 2.99 0.003 1.278297 3.241693

2 | 2.055318 .4822684 3.07 0.002 1.297626 3.255432

3 | 1.654276 .4154108 2.00 0.045 1.011253 2.706176

4 | 2.681821 .7522625 3.52 0.000 1.547619 4.647245

5 | 3.09286 .8878254 3.93 0.000 1.762046 5.428791

|

ecivil2 |

1 | .8165114 .1094629 -1.51 0.131 .6278396 1.061881

2 | .8389938 .101021 -1.46 0.145 .6626251 1.062306

|

1.naix | 1.108478 .1739279 0.66 0.512 .8150184 1.507601

|

sitlab0 |

1 | 2.429896 .4613553 4.68 0.000 1.67484 3.52535

2 | 1.940641 .3615936 3.56 0.000 1.346925 2.796063

3 | 2.353367 .4913113 4.10 0.000 1.563093 3.543191

4 | .8189107 .5970239 -0.27 0.784 .1961874 3.418236

5 | 6.758648 .9940365 12.99 0.000 5.066037 9.016778

|

IcsD | 1.44195 .262234 2.01 0.044 1.009601 2.059445

_cons | .0595486 .0138399 -12.14 0.000 .0377608 .093908

------------------------------------------------------------------------------

**- Base model, index of relative inequality for women 2016**

Generalized linear models No. of obs = 1,569

Optimization : ML Residual df = 1,559

Scale parameter = 1

Deviance = 877.5075229 (1/df) Deviance = .5628656

Pearson = 1160.379901 (1/df) Pearson = .7443104

Variance function: V(u) = u [Poisson]

Link function : g(u) = ln(u) [Log]

AIC = 1.036939

Log pseudolikelihood = -803.4782966 BIC = -10593.92

------------------------------------------------------------------------------

| Robust

salut | IRR Std. Err. z P>|z| [95% Conf. Interval]

-------------+----------------------------------------------------------------

edatg |

1 | 1.546371 .4020888 1.68 0.094 .9289314 2.57421

2 | 3.196765 .759248 4.89 0.000 2.006994 5.091848

3 | 3.988376 .9519591 5.80 0.000 2.498207 6.367424

4 | 4.336413 1.022531 6.22 0.000 2.731596 6.884063

5 | 6.017807 1.398911 7.72 0.000 3.815631 9.49096

|

ecivil2 |

1 | 1.17395 .1581823 1.19 0.234 .9014792 1.528775

2 | 1.130408 .1164318 1.19 0.234 .9237649 1.383275

|

1.naix | 1.067898 .137527 0.51 0.610 .8296784 1.374517

IcsD | 3.919767 .7687937 6.96 0.000 2.668775 5.757163

_cons | .0331557 .0085921 -13.15 0.000 .0199515 .0550989

------------------------------------------------------------------------------

**- Adjusted model, index of relative inequality for women 2016**

Generalized linear models No. of obs = 1,569

Optimization : ML Residual df = 1,554

Scale parameter = 1

Deviance = 850.8146853 (1/df) Deviance = .5474998

Pearson = 1145.055161 (1/df) Pearson = .7368437

Variance function: V(u) = u [Poisson]

Link function : g(u) = ln(u) [Log]

AIC = 1.026299

Log pseudolikelihood = -790.1318778 BIC = -10583.82

------------------------------------------------------------------------------

| Robust

salut | IRR Std. Err. z P>|z| [95% Conf. Interval]

-------------+----------------------------------------------------------------

edatg |

1 | 1.550583 .4053375 1.68 0.093 .9289289 2.588257

2 | 2.945737 .7017745 4.53 0.000 1.846753 4.698714

3 | 3.234538 .8100491 4.69 0.000 1.979883 5.284269

4 | 3.870897 1.088967 4.81 0.000 2.230233 6.71851

5 | 5.479013 1.541207 6.05 0.000 3.156935 9.509094

|

ecivil2 |

1 | 1.140824 .1492421 1.01 0.314 .8828049 1.474254

2 | 1.104181 .1123363 0.97 0.330 .9045687 1.347843

|

1.naix | 1.13965 .1482417 1.00 0.315 .8831821 1.470594

|

sitlab0 |

1 | 1.266059 .2409902 1.24 0.215 .8718275 1.838558

2 | 1.659604 .2901753 2.90 0.004 1.178081 2.337942

3 | 1.239883 .2374557 1.12 0.262 .8518502 1.804672

4 | .5067352 .4978531 -0.69 0.489 .0738753 3.475864

5 | 3.196587 .5491495 6.76 0.000 2.28274 4.476272

|

IcsD | 3.402475 .6695813 6.22 0.000 2.313583 5.003858

_cons | .0319818 .0084256 -13.07 0.000 .0190832 .0535985

------------------------------------------------------------------------------
